# Supplementary material
Source: Springer Nature journal article supplement (https://www.springermedizin.de/resource/supplementary/12943_2013_1137_MOESM8_ESM.pdf/9552568)

Prominin-1

CD29

Overlaid

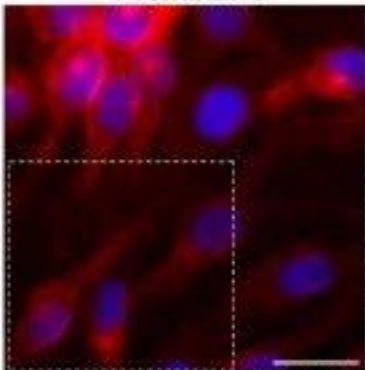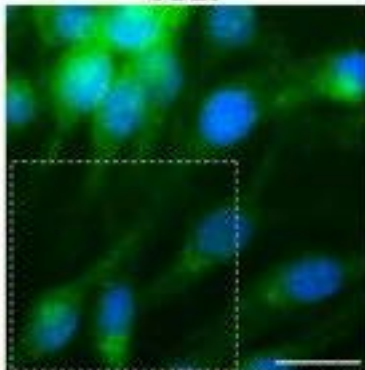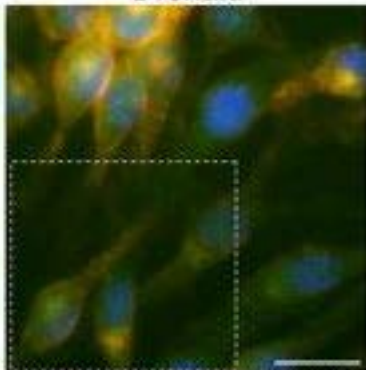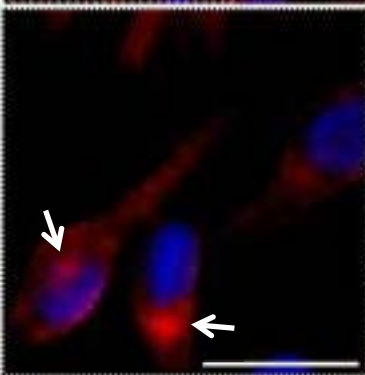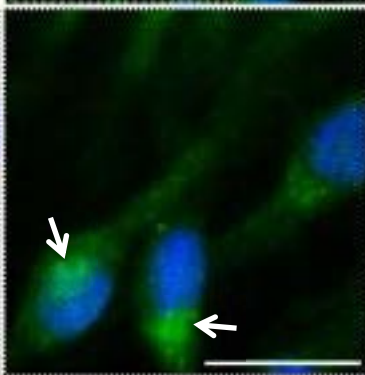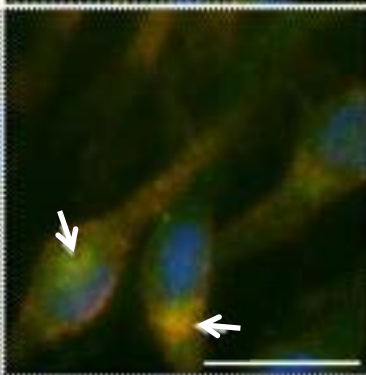

Supplement: MOESM8 [file 9552568]
